# Supplementary material for: C1QTNF3 is Upregulated During Subcutaneous Adipose Tissue Remodeling and Stimulates Macrophage Chemotaxis and M1-Like Polarization
Source: Front Immunol. 2022 Jun 2;13:914956. doi: 10.3389/fimmu.2022.914956 (PMC9202579; doi:10.3389/fimmu.2022.914956)
Supplement: Supplementary file 2 [file Table_1.xlsx]

## Sheet: Supplementary Table 1
Supplementary Table 1. Primer sequences
Gene ID	Sense	Antisense	Amplicon size (bp)
Actb	5'-GACCCAGATCATGTTTGAGA-3'	5'-GAGCATAGCCCTCGTAGAT-3'	155
Tbp	5'-AGAACAATCCAGACTAGCAGCA-3'	5'-GGGAACTTCACATCACAGCTC-3'	120
Aldoa	5'-CGTGTGAATCCCTGCATTGG-3'	5'-CAGCCCCTGGGTAGTTGTC-3'	180
Arg1	5'-CTCCAAGCCAAAGTCCTTAGAG-3'	5'-AGGAGCTGTCATTAGGGACATC-3'	185
C1qtnf3	5'-GCCTTTGCTTTTCCTCCCATT-3'	5'-CCTTGGTAACCACGAAATCCA-3'	126
Emr1	5'-CTTTGGCTATGGGCTTCCAGTC-3'	5'-GCAAGGAGGACAGAGTTTATCGTG-3'	165
Glut1 (Slc2a1)	5'-CAGTTCGGCTATAACACTGGTG-3'	5'-GCCCCCGACAGAGAAGATG-3'	156
Hif1a	5'-ACCTTCATCGGAAACTCCAAAG-3'	5'-CTGTTAGGCTGGGAAAAGTTAGG-3'	228
Il1b	5'-AATGAAAGACGGCACACCCA-3'	5'-TGCTTGTGAGGTGCTGATGT-3'	166
Nos2	5'-TGCTGTTCTCAGCCCAACAA-3'	5'-GAACTCAATGGCATGAGGCA-3'	322
Cd45	5'-ATGGTCCTCTGAATAAAGCCCA-3'	5'-TCAGCACTATTGGTAGGCTCC-3'	70
Pdgfra	5'-AGCGAGTTTAATGTTTATGCC-3'	5'-CTTCTCCAGGGTAAGTCCA-3'	157
Cdh1	5'-CCAAGCACGTATCAGGGTCA-3'	5'-GGGCATCATCATCGGTCACT -3'	82

## Sheet: Supplementary Table 2
Supplementary Table 2. FACS antibodies
Antibody	Catalogue number
Rat anti-mouse CD11b-BV711	563168 (BD Biosciences)
Rat anti-mouse CD19-BV650	563235 (BD Biosciences)
Rat anti-mouse CD206-AF488	141709 (Biolegend)
Rat anti-mouseCD25-AF700	56-0251-82 (eBioscience)
Rat anti-mouse CD3-APC efluor 780	47-0032-82 (eBioscience)
Rat anti-mouse CD45-PBC efluor 450	48-0451-82 (eBioscience)
Rat anti-mouse CD4-BV605	563151 (BD Biosciences)
Rat anti-mouse F4/80-PECy7	25-4801-82 (eBioscience)
Rat anti-mouse NOS2-PE efluor 610	61-5920-82 (eBioscience)
Rat anti-mouse CD11b-PerCP/Cyanine5.5	101228 (Biolegend)
Rat anti-mouse CD206-PE	12-2061-82 (eBioscience)
Rat anti-mouse CD206-APC	141708 (Biolegend)
Rat anti-mouse NOS2-AlexaFluor488	53-5920-82 (eBioscience)
Rat anti-mouse NOS2-APC	17-5920-82 (eBioscience)
FcR blocking reagent, mouse	130-092-575 (Miltenyi Biotec)
Click-iT™ Plus EdU Alexa 488	C10633 (eBioscience)
LIVE/DEAD™ Fixable Blue Dead Cell Stain Kit	L23105 (ThermoFisher)

## Sheet: Supplementary Table 3
Supplementary Table 3. Western blot antibodies
Antibody	Catalogue number
Rabbit anti-mouse p44/42 MAPK (ERK1/2)	4695S (Cell Signaling Technology)
Rabbit anti-mouse Phospho- ERK1/2 (Thr202/Tyr204)	4376S (Cell Signaling Technology)
Rabbit anti-mouse Akt	9272 (Cell Signaling Technology)
Rabbit anti-mouse Phospho-Akt (Ser473)	9271 (Cell Signaling Technology)
Goat anti-Rabbit IgG Secondary Antibody, HRP	31461 (Thermo Fisher Scientific)

## Sheet: Supplementary Table 4
Supplementary Table 4. Cluster analysis
Gene ID	ChowTumor_vs_ChowCtrl (FC_log2)	HFDTumor_vs_HFDCtrl (FC_log2)	HFDCtrl_vs_ChowCtrl (FC_log2)	HFCTumor_vs_ChowTumor (FC_log2)	HFDTumor_vs_ChowCtrl (FC_log2)	Cluster color
Man2a2	-0.385577065511424	-0.532918980262141	-0.5789253	-0.726267252266607	-1.11184431777803	blue
Letmd1	-0.470206443593123	-0.424708477729743	-0.6723771	-0.626879113282514	-1.09708555687564	blue
Ptpn4	-0.502446714768932	-0.682518025494103	-0.5147586	-0.69482988194239	-1.19727659671132	blue
Uqcrc2	-0.521924275911562	-0.332898707812856	-0.7234838	-0.534458207981012	-1.05638248389257	blue
Aco1	-0.525804490060435	-0.487811309742033	-0.731406265191827	-0.693413084873425	-1.21921757493386	blue
Oxnad1	-0.53073184422848	-0.645413028531054	-0.5683686	-0.683049766603631	-1.21378161083211	blue
D10Jhu81e	-0.545193645253876	-0.721238127531028	-0.488363589666353	-0.664408071943505	-1.20960171719738	blue
Ddhd2	-0.565340307923835	-0.269201211789417	-0.929407140294114	-0.633268044159696	-1.19860835208353	blue
Ivd	-0.580876674161034	-0.816934420953041	-0.7459396	-0.981997370568144	-1.56287404472918	blue
Idh3b	-0.584601876915667	-0.355824467007744	-0.7947119	-0.565934496227764	-1.15053637314343	blue
Pyurf	-0.595743615353579	-0.284238962174134	-0.8641762	-0.552671506120968	-1.14841512147455	blue
Cnst	-0.603520085235821	-0.823066216498741	-0.656852377487452	-0.876398508750373	-1.47991859398619	blue
Vegfb	-0.606294627688754	-0.874621624692394	-0.5582569	-0.826583864492121	-1.43287849218088	blue
Abca2	-0.614868142071298	-0.506808836231122	-0.992092178199191	-0.884032872359015	-1.49890101443031	blue
Mdh1	-0.614905997796711	-0.787628242354948	-0.4466136	-0.61933580383211	-1.23424180162882	blue
Pdhx	-0.640298416470862	-0.25191766139372	-0.8134341	-0.425053368931507	-1.06535178540237	blue
Sdha	-0.641760095245373	-0.63971229580228	-0.7094362	-0.707388390017488	-1.34914848526286	blue
Ndufb9	-0.641939105225128	-0.349562223842454	-0.7247027	-0.432325838350265	-1.07426494357539	blue
Mmab	-0.646849549851745	-0.413605843497216	-0.8963875	-0.663143758743033	-1.30999330859478	blue
Echs1	-0.666116508994117	-0.763672176747716	-0.894526926804734	-0.992082594558332	-1.65819910355245	blue
Ralgapa2	-0.668432361131935	-1.01691431913631	-0.8590112	-1.20749313852218	-1.87592549965412	blue
Cdkn2c	-0.675021502502576	-0.596924756250628	-1.24501244926048	-1.16691570300853	-1.8419372055111	blue
mt-Co2	-0.687259241615175	-0.159374078981396	-1.23404	-0.706154586024076	-1.39341382763925	blue
mt-Co1	-0.690913838109667	-0.268629797132948	-1.185737	-0.763453122381856	-1.45436696049152	blue
Coq9	-0.695990681532599	-0.861550270039211	-0.486928651215633	-0.652488239722245	-1.34847892125484	blue
mt-Co3	-0.70184256481826	-0.242190559434885	-1.297216	-0.837564106203305	-1.53940667102157	blue
Fdft1	-0.706203615660975	-0.380748737613371	-0.986252202896637	-0.660797324849034	-1.36700094051001	blue
Tmem143	-0.716938810302962	-0.523475376430417	-1.080101	-0.886637361263227	-1.60357617156619	blue
Gys1	-0.71997491095146	-0.188286170893416	-0.876157961744772	-0.344469221686729	-1.06444413263819	blue
Rbpms2	-0.723170419674789	-0.493232470359348	-0.7261976	-0.49625966738519	-1.21943008705998	blue
Pdp2	-0.728279340766336	-0.222215667330982	-1.20894	-0.702875946659655	-1.43115528742599	blue
Hibch	-0.73158787732214	-1.20397587367112	-0.28737559549017	-0.75976359183915	-1.49135146916129	blue
Hadh	-0.73965273837093	-0.967162493582645	-0.310562770457675	-0.53807252566939	-1.27772526404032	blue
Uck1	-0.744784051485562	-0.721366719712256	-1.339659	-1.31624208557587	-2.06102613706143	blue
Acadvl	-0.759829880924169	-0.596152304295576	-0.86909085661624	-0.705413279987647	-1.46524316091182	blue
mt-Nd3	-0.811566111655514	-0.288167578704859	-1.321155	-0.797756882777923	-1.60932299443344	blue
Dlat	-0.817916664418821	-0.610799676928222	-0.923395955457537	-0.716278967966938	-1.53419563238576	blue
C030006K11Rik	-0.827674601183628	-0.625218931320097	-0.739741580907804	-0.537285911044273	-1.3649605122279	blue
Idh3a	-0.84471545744593	-0.956088189163228	-0.2534379	-0.364810629148458	-1.20952608659439	blue
Pdha1	-0.855124119624743	-0.600243736736145	-1.525157	-1.270276361416	-2.12540048104074	blue
Hadhb	-0.871628239897976	-0.64284837776298	-0.51903344697939	-0.290253584844395	-1.16188182474237	blue
Aco2	-0.935994322399513	-0.539929941557131	-1.04865430105773	-0.652589920215349	-1.58858424261486	blue
mt-Cytb	-0.7927555238258	-0.115737326681925	-1.978081	-1.3010623877452	-2.093817911571	red
Aacs	-0.866073070852169	0.0323902751670418	-2.62721215770851	-1.7287488116893	-2.59482188254147	red
Gbe1	-0.913361522467655	-0.988390354483178	-1.76985587540362	-1.84488470741915	-2.7582462298868	red
Pdhb	-0.94490291871255	-0.613789426112334	-1.841811	-1.51069721786951	-2.45560013658206	red
Gpd2	-0.974132750035545	0.437756323980435	-2.43023279382486	-1.01834371980888	-1.99247646984442	red
Tkt	-1.07152553359036	-0.235660222037708	-3.145036	-2.30917093633683	-3.38069646992718	red
Acaca	-1.10463386446779	-0.264852921941218	-4.59022742256854	-3.75044648004198	-4.85508034450976	red
Slfn4	3.74589438446685	5.01914973842263	0.6705432	1.94379853912473	5.68969292359159	green
Ccl7	3.71821495415965	3.09380152487473	1.92685285350668	1.30243942422175	5.0206543783814	green
Has1	3.30929052080541	3.76304484491402	1.33537594007425	1.78913026418286	5.09842078498827	green
Ccl8	3.17355675878187	2.78724468513643	0.0754280681636648	-0.310884005481774	2.8626727533001	green
C1qtnf3	3.15377299724096	3.50517855414663	1.21663410841052	1.56803966531619	4.72181266255715	green
Ly6c2	3.11902712901877	2.21589085857003	1.653003	0.749867105683389	3.86889423470216	green
Chi3l3	3.07443468701739	3.08319749661103	2.78598899690784	2.79475180650148	5.86918649351887	green
Oas3	3.05156538521944	3.22703369747907	0.5265152	0.701983552697917	3.75354893791736	green
Ms4a4c	2.81221997786687	1.93125253341332	2.431069	1.55010159586635	4.36232157373323	green
Ccl2	2.79809649073195	3.14222656335164	1.9807271456116	2.32485721823129	5.12295370896325	green
Saa3	2.79161011635312	2.071331561946	2.722846	2.00256761749412	4.79417773384724	green
Clec4d	2.76303460260945	2.57158120327112	2.45801018848264	2.2665567891443	5.02959139175375	green
Ccl12	2.72159908637239	3.28898689003822	0.167194633907744	0.734582437573571	3.45618152394596	green
Cilp	2.70831461390708	1.90173862966115	1.63636901250822	0.829793028262292	3.53810764216937	green
Clec4n	2.70539120090791	1.8941516632399	1.17317593167529	0.361936394007273	3.06732759491519	green
Oas1g	2.56588096236347	2.79823246394879	0.1934971	0.425848566913635	2.99172952927711	green
Slfn1	2.52911661533996	1.99344822518908	0.9935061	0.457837756431259	2.98695437177122	green
Fcgr1	2.47385493043594	3.31642001351232	0.262388809305354	1.10495389238174	3.57880882281768	green
Bst1	2.36263998659196	1.97501620992707	1.71622617666505	1.32860240000016	3.69124238659212	green
Nxpe5	2.33596879991641	2.76575306792652	0.1680314	0.597815679924214	2.93378447984063	green
Apol9a	2.29833237368134	2.10937195982262	0.00772870779953025	-0.181231706059186	2.11710066762215	green
Ifi44	2.29448993785519	2.4764248382771	-0.4178979	-0.235962993556164	2.05852694429902	green
Ms4a6d	2.28429887761444	2.8092778201097	0.9261203	1.45109924863768	3.73539812625213	green
P4ha3	2.27245374775941	3.49381601036628	-0.1500842	1.07127807138094	3.34373181914035	green
Isg15	2.25719697648363	2.76296558522088	-0.3181193	0.187649267474028	2.44484624395766	green
Oasl1	2.25559891823641	2.66976834825021	0.2841524	0.698321783398015	2.95392070163442	green
Irf7	2.21619468657189	2.11202907106678	-0.06172579	-0.165891408168064	2.05030327840383	green
Zbp1	2.19815606897268	2.2360860185935	0.01542412	0.0533540654772285	2.25151013444991	green
Prg4	2.19730969601587	2.36485316777031	1.140531	1.30807466454118	3.50538436055706	green
Cthrc1	2.17796259785031	3.4189959156686	0.209410668746959	1.45044398656525	3.62840658441556	green
Oas1a	2.16996912838302	2.25801095098107	0.4567977	0.544839549646643	2.71480867802967	green
Chl1	2.16183537412004	2.98838365658644	-0.841932749572884	-0.0153844671064847	2.14645090701356	green
Siglec1	2.15930570713427	2.1215050869456	0.4708198	0.433019211069425	2.5923249182037	green
Timp1	2.11834666091386	3.54028186525441	0.7729855	2.1949206979235	4.31326735883736	green
Tfec	2.09625857676328	2.12914621628825	0.7304554	0.763343001119887	2.85960157788316	green
Pydc4	2.09607348626905	1.83092960105431	0.2590474	-0.00609650051149782	2.08997698575755	green
Wfdc17	2.03422696782088	3.092518293823	-0.04321735	1.01507397248357	3.04930094030445	green
Fcgr4	2.01943412912066	2.97528343448227	0.20753232076841	1.16338162613002	3.18281575525068	green
Npl	1.97505811024191	1.95600928858374	0.9503369	0.931288125202699	2.90634623544461	green
Tmem252	1.96292717172357	0.693722089265528	1.587847	0.318641575538368	2.28156874726194	green
Tlr13	1.94248649134643	2.01878887635352	1.808229	1.8845311592931	3.82701765063953	green
Gpr141	1.93466790220758	2.48134326580284	1.03305718183293	1.57973254542819	3.51440044763577	green
Trem2	1.90696534732044	1.23522950554838	3.191626	2.51988968547957	4.42685503280001	green
Bend6	1.86835936022576	1.93596696582958	1.02079204253717	1.08839964814099	2.95675900836675	green
Lyve1	1.82944292272938	2.0364269217798	0.4958643	0.702848269533847	2.53229119226323	green
Vcan	1.8253809493535	2.67071389717289	-0.2436438	0.601689115880995	2.42707006523449	green
Ms4a6c	1.82506284169977	2.19987314196066	0.5366252	0.911435525674285	2.73649836737405	green
Msr1	1.81698907887114	2.42679771601194	1.132899	1.74270782354295	3.55969690241409	green
Mx1	1.7956366338145	2.41063523078199	0.08669786	0.701696455519355	2.49733308933385	green
Col12a1	1.77923965472808	3.32699056026452	0.746735061900827	2.29448596743727	4.07372562216535	green
Mt2	1.73976452176106	1.60845660919449	1.038226	0.906918173415109	2.64668269517617	green
Clec5a	1.73947292411272	1.72275241992644	0.698103906790657	0.681383402604376	2.42085632671709	green
Ccl6	1.69968510149094	2.40105461157679	0.257656277369499	0.95902578745535	2.65871088894629	green
Ms4a7	1.69956199789576	2.20128966389914	0.5933117	1.09503938703378	2.79460138492954	green
Hp	1.69080183127753	0.778100297104567	1.75781947748591	0.845117943312953	2.53591977459048	green
Hmmr	1.68455660723351	3.05689997835702	0.965703754447595	2.33804712557111	4.02260373280462	green
C5ar1	1.67560668798921	1.83683259378333	0.775695873367696	0.936921779161818	2.61252846715102	green
Ms4a6b	1.65118970680409	1.18072539679634	1.228102	0.757637228090848	2.40882693489494	green
Usp18	1.62924333675633	2.29172294200856	-0.07262941	0.589850200228071	2.2190935369844	green
Lgmn	1.62671991576464	1.89892921121502	1.224491	1.49670078064209	3.12342069640673	green
Lrrc25	1.62012074022024	1.89946685874286	0.5320862	0.811432316240981	2.43155305646122	green
Cd68	1.60112522840277	1.42906629796141	1.61102599925397	1.43896706881261	3.04009229721538	green
Padi4	1.55951122103153	3.75596484933956	-1.086946	1.10950732594805	2.66901854697958	green
C3ar1	1.5296689060757	2.01160348345458	0.938146655231114	1.42008123261	2.9497501386857	green
Hpgds	1.52730043616866	0.897149515936963	1.635695	1.00554381950605	2.53284425567471	green
Itgam	1.51078898484365	2.22963299964091	0.3431843	1.06202828087001	2.57281726571366	green
Pf4	1.48189941067511	1.792965040351	0.32465	0.635715603921603	2.11761501459671	green
Ccr5	1.47845390819301	3.02879778921	-0.188441598149602	1.36190228286739	2.8403561910604	green
Milr1	1.47803289398179	1.58716680174819	0.7349568	0.844090750912596	2.32212364489439	green
Fcer1g	1.44258381557513	2.00320988172137	0.389017845096084	0.949643911242326	2.39222772681745	green
Hck	1.4415923324957	1.64241260369341	0.931333737740149	1.13215400893786	2.57374634143356	green
Bst2	1.43702019074424	1.84812613265464	0.247833986765744	0.658939928676154	2.09596011942039	green
Hmox1	1.43103093952194	2.24058767717944	1.30920720090844	2.11876393856594	3.54979487808788	green
Ccl9	1.42778414455786	1.91853780096014	0.773739362721265	1.26449301912354	2.6922771636814	green
B4galt5	1.42225050101529	2.11437411243504	0.514613179621327	1.20673679104107	2.62898729205636	green
Slfn2	1.41347304276061	1.28080654983358	0.915725	0.783058470573172	2.19653151333378	green
Ccr1	1.40450513774451	2.67871652125431	0.0590659945971672	1.33327737810697	2.73778251585148	green
Gp49a	1.39531453476859	1.65327570008511	1.45192575945576	1.70988692477229	3.10520145954087	green
Plek	1.37937813463492	1.31415590901609	1.101043	1.03582074775771	2.41519888239264	green
Gcnt1	1.35109057886291	1.27489280698066	1.54661387506709	1.47041610318484	2.82150668204774	green
Hk3	1.33993002140904	1.64936370328864	1.04448448008433	1.35391816196393	2.69384818337298	green
Tlr8	1.30618875879348	1.41996759837493	0.7476463	0.861425189311838	2.16761394810532	green
Cd300ld	1.30541302750711	1.24648133142014	1.07192155799141	1.01298986190444	2.31840288941155	green
Cd200r4	1.30145349211304	1.31762861324742	1.38231180388382	1.3984869250182	2.69994041713124	green
Alox5ap	1.27525832431229	1.94979770241792	0.248179957371056	0.922719335476689	2.19797765978898	green
Emr1	1.26368673046695	1.56939679467514	0.612494735383882	0.918204799592074	2.18189153005903	green
S100a4	1.25157499386873	1.95892922230203	1.198588	1.90594230343254	3.15751729730127	green
Ripk3	1.22689392338726	1.55726969262093	1.073275	1.40365106648701	2.63054498987427	green
Loxl4	1.2228877459661	1.94305667521652	0.451484	1.17165290240943	2.39454064837553	green
Lair1	1.22192523892865	1.5162423346376	0.900346	1.19466314519709	2.41658838412574	green
Kcnab2	1.2195043057675	1.58705130655002	1.160111	1.52765785126843	2.74716215703593	green
Lilrb4	1.18750142183526	1.81656478139756	0.9432354	1.57229877100106	2.75980019283632	green
Sfpi1	1.18633727766944	1.42710003225193	0.824165	1.06492773576997	2.2512650134394	green
Ctss	1.15076763060133	1.42119431204106	1.06658059485815	1.33700727629787	2.48777490689921	green
Lst1	1.13578870264626	2.28957600355595	-0.2544802	0.899307149609592	2.03509585225585	green
Ada	1.10424860034122	1.2616096102681	1.08140108241483	1.2387620923417	2.34301069268292	green
Emb	1.0388558196682	1.84530643082401	0.26999310158502	1.07644371274083	2.11529953240903	green
Emp3	1.00620562544078	1.76776030649749	0.753176892115728	1.51473157317244	2.52093719861321	green
Nt5dc2	0.961656552809396	2.11107477384323	0.6228059	1.77222412212832	2.73388067493772	green
Cd44	0.885402446708128	1.87690536548805	0.483363506337997	1.47486642511792	2.36026887182605	green
Rab31	0.877419628713813	1.13910506684752	1.209534	1.47121954725688	2.34863917597069	green
Ckap4	0.848760126093485	2.09259618108328	0.0320264759421952	1.27586253093199	2.12462265702547	green
Fkbp10	0.816031512531206	1.81980006449454	0.381656427168725	1.38542497913206	2.20145649166327	green
Tubb6	0.750855170693934	1.96128746149487	0.2137961	1.42422835683835	2.17508352753228	green
Capg	0.558465288829284	1.489655883635	0.831367742322667	1.76255833712838	2.32102362595766	green
AW011738	0.951616739331693	0.416878730443496	-0.573648552696737	-1.10838656158493	-0.156769822253241	purple
Sppl2a	0.337248107454266	0.113977510108134	-0.03519618	-0.258466778169898	0.078781329284368	purple
Stat3	0.283438403909009	0.218399685625224	-0.03670656	-0.101745273506096	0.181693130402913	purple
Ppm1b	-0.296798376255985	-0.539762503350846	-0.04479813	-0.287762261077028	-0.584560637333013	purple
Csde1	-0.302932389743264	-0.405013977191479	0.208690084765958	0.106608497317744	-0.19632389242552	purple
Mtor	-0.306506654227795	-0.34447430550008	-0.06060035	-0.0985679999146161	-0.405074654142412	purple
Ric8b	-0.311965299532893	-0.321668806227366	-0.3384877	-0.348191158804712	-0.660156458337605	purple
Slc25a46	-0.313689186183206	-0.350468543243344	0.06041227	0.0236329088708969	-0.290056277312309	purple
Opa1	-0.350745732946958	-0.348174333320431	-0.1600535	-0.15748211962408	-0.508227852571038	purple
Kctd2	-0.359818809281964	-0.600019901805298	-0.2303495	-0.470550620156258	-0.830369429438222	purple
Pex7	-0.362664372717304	-0.0984624287447237	-0.1467348	0.117467110618509	-0.245197262098795	purple
1110057K04Rik	-0.378807841879955	-0.309924898084825	-0.367925501828578	-0.299042558033449	-0.677850399913404	purple
Sun2	-0.37926873695328	-0.51694336930315	0.04651277	-0.091161858286665	-0.470430595239945	purple
Hdhd2	-0.395877803738449	-0.313298651283087	-0.28422024759027	-0.201641095134908	-0.597518898873357	purple
Foxred1	-0.398984777734564	0.0702245292611153	-0.230548580539614	0.238660726456065	-0.160324051278499	purple
Dlst	-0.402537167602727	0.141390550688293	-0.370190610032053	0.173737108258967	-0.22880005934376	purple
Apoa1bp	-0.403976490006276	-0.194940808673281	-0.363994013042226	-0.154958331709231	-0.558934821715507	purple
Dnaja3	-0.409003787845296	-0.0640151625783484	-0.51173855366366	-0.166749928396713	-0.575753716242009	purple
Kxd1	-0.416129774315406	-0.12152704821872	-0.435202	-0.140599300314284	-0.55672907462969	purple
Lonp2	-0.417936168550874	-0.673504927728736	-0.06947234	-0.325041094686354	-0.742977263237228	purple
Pmpcb	-0.425562732368372	-0.34500483247732	-0.2920286	-0.211470734905337	-0.637033467273709	purple
Aifm1	-0.426104618533108	-0.160591513030568	-0.351931259101975	-0.0864181535994349	-0.512522772132543	purple
Ndufa9	-0.427070580392725	-0.084513881270093	-0.3556137	-0.0130569827670956	-0.44012756315982	purple
Bag4	-0.428949914004508	-0.458515056814837	-0.258916184910175	-0.288481327720504	-0.717431241725012	purple
Pgrmc2	-0.433765682200601	-0.685223858767338	-0.09267719	-0.34413536924125	-0.777901051441851	purple
Ndufa6	-0.44055385550685	-0.399771247205651	-0.4433498	-0.402567170104868	-0.843121025611718	purple
Letm1	-0.440824735738647	-0.341248031314064	-0.1989507	-0.0993740270677478	-0.540198762806395	purple
Atp5c1	-0.442662303048685	-0.0819560291680738	-0.564934231419347	-0.204227957538736	-0.646890260587421	purple
Ndufs4	-0.44558465385237	-0.254284405540952	-0.5902458	-0.398945523611865	-0.844530177464235	purple
Ndufc2	-0.446736938728811	-0.132826264902341	-0.3167599	-0.00284920362663466	-0.449586142355445	purple
Uqcrh	-0.448838256574887	-0.269982246743404	-0.6279417	-0.449085722951536	-0.897923979526422	purple
Atp5g3	-0.462369602424149	-0.147576773162295	-0.405957761828666	-0.0911649325668125	-0.553534534990961	purple
Trap1	-0.46321889530213	-0.295228281307587	-0.3397286	-0.171738000314424	-0.634956895616554	purple
Ndufb10	-0.494861513525071	-0.152409958720131	-0.6500885	-0.307636946534941	-0.802498460060012	purple
Ndufs2	-0.495361717192678	-0.0233637841942845	-0.6134791	-0.141481129185129	-0.636842846377807	purple
Sod1	-0.49983090023297	-0.18041727192907	-0.5963008	-0.276887200273841	-0.776718100506812	purple
Atp5a1	-0.513771178559706	-0.199480390442856	-0.441254388090929	-0.126963599974079	-0.640734778533785	purple
Sdhd	-0.516333391748481	-0.0516312012169399	-0.7067902	-0.242088045724013	-0.758421437472493	purple
Uqcrc1	-0.52236265824115	-0.212084249898981	-0.4989685	-0.188690117970135	-0.711052776211285	purple
Akap1	-0.523801673417546	-0.299461013886643	-0.528821786321435	-0.304481126790533	-0.828282800208078	purple
Ak2	-0.524773856421383	-0.433937194408902	-0.0602956643640537	0.0305409976484279	-0.494232858772956	purple
Hibadh	-0.52512554466432	-0.68239260620239	-0.204498553564475	-0.361765615102545	-0.886891159766865	purple
Cox6c	-0.525483749120199	-0.17397067869422	-0.648095855598871	-0.296582785172893	-0.822066534293091	purple
Suclg1	-0.525536140263406	-0.198738178486923	-0.2415407	0.0852573021380154	-0.440278838125391	purple
Acot2	-0.527296937381908	-0.303790177580134	-0.428601843397474	-0.2050950835957	-0.732392020977607	purple
Chchd3	-0.53144976038346	0.202334520691935	-0.349737199168348	0.384047081907048	-0.147402678476413	purple
Atp5o	-0.532019596736184	-0.196193033423084	-0.401471697873022	-0.0656451345599219	-0.597664731296106	purple
Cox4i1	-0.535426863773842	-0.352554530684129	-0.461583826082059	-0.278711492992346	-0.814138356766188	purple
Dnajc15	-0.535589502811633	-0.424228794753642	-0.326326560649477	-0.214965852591485	-0.750555355403118	purple
Ndufa4	-0.549938244513749	-0.346860823570029	-0.5141302	-0.311052819569705	-0.860991064083455	purple
Cluh	-0.55015220410467	-0.51361671134368	-0.458172004975803	-0.421636512214812	-0.971788716319482	purple
Etfdh	-0.552110780198108	-0.649909385289783	0.0146946709985197	-0.0831039340931549	-0.635214714291263	purple
Tef	-0.55638738937193	-0.918458285760089	0.4408944	0.0788235043504169	-0.477563885021513	purple
Sdhb	-0.557003776730596	-0.0201973921305662	-0.8413345	-0.304528145284116	-0.861531922014712	purple
Ndufb4	-0.561980412877223	-0.45101068756901	-0.2860106	-0.175040849272464	-0.737021262149688	purple
Uqcr11	-0.570870495320999	-0.323657756874844	-0.6389951	-0.391782313685772	-0.962652809006771	purple
Etfb	-0.572728735250423	-0.438542543805181	-0.342638250176593	-0.208452058731352	-0.781180793981775	purple
Mdh2	-0.575008360632479	-0.123348643671118	-0.376879	0.0747807164196639	-0.500227644212815	purple
Ndufv1	-0.578587636306357	-0.22384607323671	-0.4765168	-0.121775251113245	-0.700362887419602	purple
Idh3g	-0.597487905892038	-0.0214519480445809	-0.5415423	0.0344936880665426	-0.562994217825496	purple
Atp5b	-0.604084818212931	-0.136763122986988	-0.4407719590996	0.0265497361263433	-0.577535082086588	purple
Uqcr10	-0.610112414031519	-0.219530140171326	-0.5346784	-0.144096114058952	-0.754208528090472	purple
Cox5b	-0.613225971047892	-0.0804261209056416	-0.656660609165144	-0.123860759022894	-0.737086730070786	purple
Ndufb8	-0.61747107232178	-0.24466586120519	-0.6542056	-0.281400359725935	-0.898871432047715	purple
Cpt2	-0.620191116773435	-0.590308694418017	-0.423447604901715	-0.393565182546297	-1.01375629931973	purple
Cox6a1	-0.624376947267158	-0.331285060986325	-0.466500935726742	-0.173409049445908	-0.797785996713066	purple
Ndufa10	-0.627334814429194	-0.229147533975999	-0.5559162	-0.157728966726576	-0.78506378115577	purple
Acads	-0.634687566430329	-0.714626366905123	-0.233239989593181	-0.313178790067975	-0.947866356498304	purple
Sucla2	-0.635673526454099	-0.668635154370277	-0.3119261	-0.344887726893648	-0.980561253347747	purple
Bola3	-0.649639234116249	-0.43215060160698	-0.448344580927659	-0.23085594841839	-0.880495182534639	purple
Dld	-0.650626322710935	-0.212786010305658	-0.457937666302742	-0.0200973538974645	-0.670723676608399	purple
Uqcrfs1	-0.655076311821052	-0.244895905451405	-0.7495502	-0.339369804363481	-0.994446116184534	purple
Hadha	-0.658224798725215	-0.265840266105555	-0.616618771154265	-0.224234238534605	-0.88245903725982	purple
Ndufs1	-0.665558294601084	-0.123287031818102	-0.6712076	-0.128936304335861	-0.794494598936945	purple
Cs	-0.666965098823971	0.00690557822550996	-0.942863083331884	-0.268992406282403	-0.935957505106374	purple
Eci1	-0.695326875961329	-0.676780910949625	-0.329978670035638	-0.311432705023933	-1.00675958098526	purple
Rpusd3	-0.718756187678203	-0.633987310390521	0.233362	0.318130916099488	-0.400625271578715	purple
Taldo1	-0.730290324924302	-0.180246392434501	-0.831916	-0.281872027030655	-1.01216235195496	purple
Cyc1	-0.737129383735406	-0.118892530722757	-0.842932510755166	-0.224695657742517	-0.961825041477923	purple
Lyrm5	-0.767637409146104	-0.804211216075699	-0.2550627	-0.291636513171671	-1.05927392231777	purple
Dbp	-0.819498337553104	-1.07581915354593	0.682270433746929	0.425949617754097	-0.393548719799006	purple
Aldoa	-0.85186886268985	-0.41164281395227	-0.660257516042562	-0.220031467304982	-1.07190032999483	purple
Nos2	-0.920519281269506	-0.856444130795231	0.1383971	0.202472283126027	-0.718046998143479	purple
Mfap4	2.4005936309909	1.172651620822	0.857322	-0.370620002701276	2.02997362828963	cyan
Oas2	2.27794130772308	2.01208234323756	-0.04531193	-0.311170897143553	1.96677041057953	cyan
Oasl2	2.13354928473218	2.18868435970225	-0.256099	-0.200963942478724	1.93258534225345	cyan
Apol9b	2.09924583078824	1.68141491803377	0.297839338607905	-0.119991574146563	1.97925425664168	cyan
BC147527	1.93744056966818	1.4369791532949	0.433862436853083	-0.066598979520204	1.87084159014798	cyan
Ifit1	1.92980865936258	2.12423918541908	-0.2700926	-0.0756620592225813	1.85414660014	cyan
Spta1	1.89333095421437	0.700537128566457	1.433013	0.240218839744148	2.13354979395852	cyan
Plac8	1.87885098474849	2.28359051069095	-0.6171274	-0.212387899606299	1.66646308514219	cyan
Phf11b	1.82142093209823	1.79382631497668	0.1878048	0.160210202309325	1.98163113440755	cyan
Ddx60	1.72896833070039	1.40287106715989	0.0244051992776707	-0.301692064262827	1.42727626643756	cyan
Ifit3	1.70024076926647	1.48886092804444	-0.3653446	-0.576724415295497	1.12351635397097	cyan
Ly6a	1.68452392624596	1.26772065905576	-0.01789299	-0.434696252920253	1.24982767332571	cyan
Dhx58	1.67683917979558	1.90035087910399	-0.018794377360449	0.204717321947955	1.88155650174354	cyan
Lgi2	1.66045608552125	1.58653199918206	-0.3689727	-0.442896744583993	1.21755934093726	cyan
H2-T24	1.65519611799475	0.82360841475797	0.498832796477035	-0.332754906759746	1.322441211235	cyan
Gm12250	1.65038926199681	2.03785928479018	-0.211582105435858	0.17588791735751	1.82627717935432	cyan
P2ry12	1.62102376435325	1.27119959461459	0.7993568	0.449532606482517	2.07055637083576	cyan
Cbr2	1.61541558524912	1.77006648721944	0.0107439773488793	0.165394879319194	1.78081046456832	cyan
Eln	1.60564169799557	0.60806053756983	0.297334141077502	-0.700247019348237	0.905394678647332	cyan
I830012O16Rik	1.57232109838167	1.33622141810564	-0.3074243	-0.54352399256988	1.02879710581179	cyan
Mnda	1.56870710928714	1.76487612068347	0.1760637	0.372232697980529	1.94093980726767	cyan
Gm7609	1.54897821419105	0.952357936576863	0.498320347588033	-0.0982999300261526	1.4506782841649	cyan
Folr2	1.53187673638059	1.51284200856922	0.370054863240704	0.351020135429339	1.88289687180993	cyan
Arsi	1.52288460756989	1.65562292143636	-0.245719004805692	-0.112980690939226	1.40990391663067	cyan
Trim30a	1.51694933764561	1.20823878936124	0.2935932	-0.0151173403407668	1.50183199730484	cyan
I830077J02Rik	1.47371966840085	1.5043610591832	0.01446382	0.0451052061692984	1.51882487457015	cyan
Ifit2	1.4700368404782	1.46940364272815	0.4071349	0.40650174779549	1.87653858827369	cyan
Mx2	1.46943523214129	1.74278422446762	-0.2519281	0.0214209083903701	1.49085614053165	cyan
Mrc1	1.45646822837752	1.71315023625324	0.2379887	0.494670690691674	1.95113891906919	cyan
Tlr7	1.44932129046182	1.28478738087995	0.8630351	0.698501218727743	2.14782250918956	cyan
Fbln2	1.44927570055023	1.03346587123225	0.968092054122113	0.552282224804128	2.00155792535436	cyan
Tfpi2	1.4349890930186	0.345803812939988	1.4152	0.326014341870149	1.76100343488875	cyan
Hpse	1.41401207170211	1.26620251595939	0.4612426	0.313433006781187	1.72744507848329	cyan
Aoah	1.41028245994914	1.70969263253244	-0.338805646197423	-0.0393954736141289	1.37088698633501	cyan
Phf11a	1.41023843969205	2.58182211904098	-0.8076024	0.363981315409019	1.77421975510107	cyan
Fcgr2b	1.39700934587278	1.85839188831917	0.0212614497284818	0.482643992174867	1.87965333804765	cyan
Rtp4	1.39378751758365	1.62023786752795	-0.5935192	-0.367068878609988	1.02671863897366	cyan
F13a1	1.39134440612767	1.42566587453236	0.220575180047379	0.254896648452068	1.64624105457974	cyan
Gm5431	1.39107765788732	1.61774060063511	0.078142444675342	0.304805387423128	1.69588304531045	cyan
C1qc	1.38557873631017	1.42984572474973	0.388497273356334	0.43276426179589	1.81834299810606	cyan
Clec10a	1.38232629176798	0.935386615873297	0.425869906833185	-0.0210697690614959	1.36125652270648	cyan
Dhh	1.37966216559918	0.720595082152089	0.69709176750117	0.0380246840540764	1.41768684965326	cyan
C1qa	1.37417651730957	1.67641726334164	0.0487211741119902	0.35096192014406	1.72513843745363	cyan
Fbn1	1.36697874462397	1.34207846361553	-0.0214479377418389	-0.0463482187502751	1.32063052587369	cyan
Xaf1	1.36591499961513	1.11364752856134	0.05381382	-0.1984536467948	1.16746135282033	cyan
Fstl1	1.35598538731597	0.811486968022846	0.689027727194148	0.144529307901025	1.50051469521699	cyan
Cma1	1.35111734578366	0.100883504671716	0.216253143656756	-1.03398069745519	0.317136648328472	cyan
Phf11d	1.34858405238015	1.14189486345785	-0.07865106	-0.285340251309334	1.06324380107082	cyan
Ifi204	1.34818912666446	1.63423959164733	0.1307868	0.416837298437496	1.76502642510196	cyan
Dck	1.34771327360841	1.43195138908413	0.660449177844841	0.744687293320568	2.09240056692897	cyan
Ifi47	1.34585928411074	1.29873344398806	0.2374141	0.190288308611099	1.53614759272184	cyan
Trim30d	1.34162127911589	1.04073763668972	0.2539594	-0.0469242657709352	1.29469701334495	cyan
Ifitm3	1.33197479852667	1.5479577989853	-0.07345748	0.142525516388147	1.47450031491482	cyan
Apod	1.33059390080087	0.284429669232556	-0.225173580802704	-1.27133781237102	0.0592560884298514	cyan
Slfn8	1.32779296412816	1.16544329797094	0.2232087	0.0608590475816545	1.38865201170982	cyan
Stat2	1.32710394988225	1.42738132707981	-0.2048519	-0.104574488451047	1.2225294614312	cyan
Csf3r	1.32708664945912	1.59637729404856	0.251291286585004	0.520581931174453	1.84766858063357	cyan
Dab2	1.32543891875527	1.74518190317273	0.148840201845944	0.568583186263406	1.89402210501867	cyan
C1qb	1.32470211484875	1.60563433863836	0.163711136103639	0.444643359893247	1.769345474742	cyan
Thbs3	1.32044224589744	0.87807104444997	0.1775933	-0.264777906725383	1.05566433917206	cyan
Tnfaip6	1.32042853398767	2.09046195980911	-0.4300279	0.340005555257398	1.66043408924506	cyan
Serpina3n	1.2989345114525	0.169750591782239	1.267878	0.138693893681587	1.43762840513409	cyan
Sfrp2	1.28067529262748	0.853665977690497	-0.9389611	-1.36597038939286	-0.0852950967653775	cyan
Fcgr3	1.27007599815828	1.44655563700043	0.434024832288765	0.610504471130912	1.88058046928919	cyan
Ms4a4d	1.2684214584989	0.43146261637889	0.2501135	-0.586845332827095	0.681576125671808	cyan
Cfp	1.26495152598788	1.50897647634535	0.0334155595233355	0.277440509880806	1.54239203586868	cyan
Col3a1	1.25568597144838	0.960751549702838	0.171290123765652	-0.123644297979893	1.13204167346849	cyan
Thy1	1.24326784305595	0.74954700022596	0.2168349	-0.276885933091441	0.966381909964509	cyan
Ube2l6	1.23708092045019	1.07300915601647	0.1720324	0.00796066939929107	1.24504158984948	cyan
Lilrb3	1.23527732913392	1.45413210627931	0.5414564	0.760311215671064	1.99558854480498	cyan
Stab1	1.22951116444218	1.2675788139315	0.6113123	0.649379933912094	1.87889109835428	cyan
Adm	1.2256912820597	0.29134793595595	1.45092392196957	0.516580575865815	1.74227185792552	cyan
P2ry6	1.21189367258593	1.57241111546695	0.4093343	0.76985171075714	1.98174538334307	cyan
Ctsc	1.20964871403483	1.69945038758472	-0.0653563623440223	0.424445311205862	1.63409402524069	cyan
Bgn	1.20961103034845	1.07504564137192	0.517418350358559	0.382852961382036	1.59246399173048	cyan
Clec4a1	1.20025849557001	1.89885908324453	-0.14776612239184	0.550834465282683	1.75109296085269	cyan
Adamts4	1.18979088272802	2.01059093472448	-0.1204488810088	0.700351170987656	1.89014205371568	cyan
Clec4a3	1.18427031278197	1.80690506495003	0.226724243474053	0.84935899564211	2.03362930842408	cyan
Mfap2	1.1810413266448	-0.132393175250764	0.3181271	-0.995307395899063	0.185733930745735	cyan
Col1a2	1.17642227799389	0.945419143559385	0.371174682513699	0.140171548079196	1.31659382607308	cyan
F830016B08Rik	1.17574616199496	0.755946034050061	-0.398651526442307	-0.818451654387208	0.357294507607754	cyan
Olfml3	1.17383718619666	1.02184319050499	0.5652544	0.413260436974025	1.58709762317068	cyan
Stard8	1.17170045496418	1.03117297255767	0.4790092	0.338481682852645	1.51018213781682	cyan
Slc8a1	1.16502460424733	-0.0789408577576641	1.752515	0.508549611494003	1.67357421574133	cyan
Fn1	1.16000099255415	1.11719260901183	-0.357778670082446	-0.400587053624756	0.759413938929389	cyan
Sdc3	1.15032871767686	1.56297847174185	0.2174969	0.630146617941179	1.78047533561804	cyan
Evi2a	1.13739680973744	1.43959231523769	0.583465709586687	0.88566121508694	2.02305802482438	cyan
Herc6	1.13525200899917	1.11321563300145	0.11060063844177	0.0885642624440481	1.22381627144322	cyan
Irgm1	1.12679122340664	1.58119473797388	-0.1726316	0.281771925543861	1.4085631489505	cyan
Col1a1	1.11737399839577	1.21193591799057	0.0653209162033247	0.159882835798126	1.2772568341939	cyan
Mfap5	1.11412338222161	0.842650609615471	0.2696498	-0.00182292490671064	1.1123004573149	cyan
Oas1b	1.11401597690167	0.784209526192685	0.007327704	-0.322478746927257	0.791537229974413	cyan
Tubb2b	1.11115568603671	1.29255497229389	0.01406796	0.195467250007663	1.30662293604437	cyan
Ifi203	1.10659881969541	0.617810038150555	0.0946975	-0.394091280426102	0.712507539269303	cyan
Gpr124	1.10297913411413	1.39467280698061	-0.220787596336495	0.070906076529986	1.17388521064412	cyan
Ninj1	1.10086600775736	0.966524226276464	0.559524	0.425182231401142	1.5260482391585	cyan
Lpar1	1.08531472392641	0.499756373729528	0.01703829	-0.568520064319288	0.516794659607126	cyan
Il3ra	1.0851432180143	0.128089921673697	0.7821902	-0.174863138099371	0.910280079914931	cyan
Trex1	1.08407552352974	1.23712523647423	0.1795606	0.332610263171592	1.41668578670134	cyan
Pld4	1.07574871266454	1.32393363806997	0.2070153	0.455200256281389	1.53094896894593	cyan
Gm4951	1.07529227222268	1.03764360743474	-0.81211889509545	-0.849767559883391	0.225524712339291	cyan
Gbp3	1.07201532585271	0.81840984081501	-0.0414128144762909	-0.295018299513993	0.776997026338719	cyan
Lgals3bp	1.0660183279447	0.655058922068212	0.2548774	-0.156082033544981	0.909936294399717	cyan
Irgm2	1.06291098665284	1.04594448611783	-0.35296	-0.369926453394188	0.692984533258656	cyan
Cd33	1.06258806450158	0.223899814345133	0.717280948297782	-0.12140730185867	0.941180762642915	cyan
Lgals9	1.05471416685048	1.12539595802274	-0.1846871	-0.114005327832231	0.94070883901825	cyan
Adora2b	1.04558935266814	2.14774515556115	-0.471594376920978	0.630561425972033	1.67615077864017	cyan
A4galt	1.03312955831765	0.78344338663193	1.08845231055583	0.838766138870115	1.87189569718776	cyan
Gch1	1.03060072788483	1.00414917971434	0.497823325062308	0.47137177689182	1.50197250477665	cyan
Glipr2	1.02704685852438	1.38249914855762	0.0762535751901887	0.431705865223428	1.45875272374781	cyan
Sp100	1.02632715836099	0.380328163106112	0.5323147	-0.113684343623785	0.912642814737205	cyan
Ctla2b	1.0207917101576	0.44245202824393	1.02429696391867	0.445957282004999	1.4667489921626	cyan
Ugt1a7c	1.01644012546416	0.97136948975641	0.8790397	0.8339690514997	1.85040917696386	cyan
Tyrobp	1.01006628710451	1.31892386988997	0.7164595	1.02531706171645	2.03538334882096	cyan
Pdlim1	1.00740495553352	0.798423628191973	0.5930306	0.384049270118166	1.39145422565168	cyan
AI607873	1.00720728956228	0.826202405649303	0.290540398829646	0.109535514916672	1.11674280447895	cyan
Csf1r	1.00392625359318	0.780407294876939	0.415653950440083	0.192134991723845	1.19606124531702	cyan
Flrt2	0.995565494889861	0.911076129791594	-0.0762611387468266	-0.160750503845094	0.834814991044767	cyan
Pcolce	0.995312583201374	0.926351750334898	0.6492326	0.580271803683371	1.57558438688474	cyan
Eif2ak2	0.987962476324266	0.927374820913928	0.0143111059703127	-0.0462765494400252	0.941685926884241	cyan
Ddx58	0.978747751488447	0.965281143209903	-0.176746504966619	-0.190213113245163	0.788534638243284	cyan
Loxl2	0.969319964563945	1.43282842262179	0.2120539	0.675562319846446	1.64488228441039	cyan
Lmo2	0.962543240296401	0.0629159432142267	0.9027969	0.00316958440196618	0.965712824698367	cyan
Pik3ap1	0.958293657418586	0.683479750454014	1.192041	0.91722729775236	1.87552095517095	cyan
Parp14	0.947726534805668	0.686293397750546	0.1905054	-0.0709277120967202	0.876798822708948	cyan
H2-T23	0.945561152740427	0.233586016452817	0.0467330588068033	-0.665242077480807	0.28031907525962	cyan
Ly6e	0.941395794828583	0.754227822023357	-0.379734	-0.566901990454736	0.374493804373847	cyan
Entpd1	0.939935274750295	0.387706698876554	0.09731469114721	-0.454913884726531	0.485021390023764	cyan
Samd9l	0.93645155085359	0.612907934866519	0.6047493	0.281205665586595	1.21765721644018	cyan
Clec4a2	0.934158283212432	1.61569621779123	0.248781582039289	0.930319516618086	1.86447779983052	cyan
C1qtnf6	0.930570111262381	1.25262455842248	0.0316987955844251	0.353753242744523	1.2843233540069	cyan
Cdr2l	0.929648736397019	1.70727094578622	0.194365378565843	0.971987587955041	1.90163632435206	cyan
Adar	0.928747486748563	0.889300403031343	0.168277427578953	0.128830343861734	1.0575778306103	cyan
Efemp2	0.92356206904577	1.45066248935606	-0.254379405565781	0.272721014744507	1.19628308379028	cyan
Cfb	0.920069776661237	0.376308262852866	0.567774559013845	0.0240130452054736	0.944082821866711	cyan
Cmpk2	0.911946986100223	1.04988043036612	-0.301254067304743	-0.163320623038845	0.748626363061378	cyan
Tlr2	0.90485641797421	1.1843115556564	-0.2119199	0.0675352034788694	0.97239162145308	cyan
Ctsh	0.900260911484284	0.716534048231624	0.0822490828401675	-0.101477780412492	0.798783131071792	cyan
Ehd4	0.886497241089896	0.921933415635461	0.465893962524877	0.501330137070443	1.38782737816034	cyan
Slfn5	0.886495095069124	0.217294119048406	0.4588206	-0.210380332498169	0.676114762570954	cyan
Snx2	0.886013953776776	1.08012022958579	0.3002386	0.494344869862056	1.38035882363883	cyan
F630028O10Rik	0.885031757720658	1.34243584016485	0.0817077993102271	0.53911188175442	1.42414363947508	cyan
Ctla2a	0.88343338120696	0.0370464416519498	1.19537171869734	0.348984779142333	1.23241816034929	cyan
Itga5	0.882220024062221	1.45543251005155	0.4901635	1.06337602564438	1.9455960497066	cyan
Maf	0.879828354459475	0.835972238976559	0.07143636	0.027580247446322	0.907408601905797	cyan
Grn	0.876233243929786	0.978189708040934	0.642373334110839	0.744329798221987	1.62056304215177	cyan
Rab8b	0.875018433480633	0.919810436049227	0.5423984	0.587190445089593	1.46220887857023	cyan
Ifih1	0.873492065347071	0.820860890874275	-0.169176	-0.221807126274514	0.651684939072557	cyan
Emilin1	0.872786687615927	1.16588864448486	0.356929193200403	0.650031150069337	1.52281783768526	cyan
Clcn5	0.870044867936979	1.06526359204405	0.318857981609294	0.514076705716361	1.38412157365334	cyan
Plat	0.864771519956121	0.888794523464291	-0.0964682	-0.0724451916257341	0.792326328330387	cyan
Ndrg4	0.85573209158988	1.11663038411288	0.1155105	0.37640877024308	1.23214086183296	cyan
Parp12	0.852677129285401	1.26875802792394	0.03552828	0.451609178943784	1.30428630822919	cyan
Ccdc109b	0.835628219413046	1.43268104383676	0.331107316481322	0.928160140905037	1.76378836031808	cyan
Parp9	0.827447015546953	0.350601859308398	0.4086112	-0.0682339115575085	0.759213103989445	cyan
Tagln2	0.826443020486125	1.60821679808001	-0.02833635	0.753437425967906	1.57988044645403	cyan
Apbb1ip	0.825459399100627	0.821464353585258	0.789121098918222	0.785126053402853	1.61058545250348	cyan
Procr	0.82394979137525	0.392988884623444	0.6396558	0.208694848798966	1.03264464017422	cyan
Emilin2	0.821213092960532	1.68093952007035	-0.0364423013728806	0.823284125736943	1.64449721869747	cyan
Casp4	0.818980068188617	1.00092941073457	0.268191004986498	0.450140347532453	1.26912041572107	cyan
Gbp7	0.806642488957678	0.909639191991358	-0.0577476579902493	0.0452490450434314	0.851891534001109	cyan
Ppic	0.792735453530256	0.44956823157942	1.055156	0.71198890702077	1.50472436055103	cyan
Dtx3l	0.791844979875942	0.502111476871794	0.243493401105316	-0.0462401018988319	0.74560487797711	cyan
Irf9	0.783173792255663	0.583934603007981	-0.1618292	-0.361068428474038	0.422105363781625	cyan
Tor3a	0.775840178696739	0.917833511593174	0.2159437	0.357937082848764	1.1337772615455	cyan
Gm6548	0.764824364101525	0.786134955645575	-0.0426002297536352	-0.0212896382095855	0.74353472589194	cyan
Emp1	0.764422338875865	0.553887173092062	1.35333453197647	1.14279936619267	1.90722170506854	cyan
Il1r1	0.763609110209735	0.472786561984828	0.1556251	-0.135197419113462	0.628411691096273	cyan
Cyba	0.756208334298701	0.995925174489751	0.934778116235211	1.17449495642626	1.93070329072496	cyan
Scara3	0.751883436489479	0.71785864068367	-0.5004	-0.534424778640623	0.217458657848856	cyan
B3gnt3	0.749987619912964	0.988676232774488	0.748578508110542	0.987267120972067	1.73725474088503	cyan
Pnp	0.738182461758646	0.748007553675971	0.3847581	0.394583143087984	1.13276560484663	cyan
Nfxl1	0.731921888261219	1.13151325845458	-0.1703208	0.229270533133263	0.961192421394482	cyan
Cmtm3	0.728605593014304	0.768531559659954	0.349900567361718	0.389826534007368	1.11843212702167	cyan
Ptgr1	0.72688405737374	1.60937523802673	0.3986583	1.28114944143991	2.00803349881365	cyan
Sirpa	0.726837586150861	1.02939878177674	0.4762856	0.778846771200567	1.50568435735143	cyan
Prcp	0.724744991570047	0.610616510939888	0.3208172	0.206688728316097	0.931433719886144	cyan
Dclre1c	0.719510467180577	0.630768589004255	0.325523100116946	0.236781221940624	0.956291689121201	cyan
Trim25	0.715179399140567	0.782740366388263	0.1504094	0.217970392333738	0.933149791474305	cyan
Myo7a	0.709632092844954	1.05254483424778	0.602708	0.945620731101965	1.65525282394692	cyan
Bcl3	0.698805754690605	1.05908847461274	-0.677742968677011	-0.31746024875488	0.381345505935725	cyan
Bmp1	0.689109750147041	0.699313837516768	0.087365207981972	0.0975692953516992	0.78667904549874	cyan
Serpinb6a	0.67831355880961	0.660407251925249	0.7611243	0.743217968180382	1.42153152698999	cyan
Uba7	0.677244281848003	0.0229484765589454	0.2062573	-0.44803855416407	0.229205727683933	cyan
2017-09-11	0.673456817944007	0.903827860004122	0.430731	0.661102042592962	1.33455886053697	cyan
Rab11fip5	0.667395652147758	0.68489390010467	0.355696	0.37319428009192	1.04058993223968	cyan
Tnfrsf11a	0.659294066308778	0.986042734318627	0.2542267	0.580975386247566	1.24026945255634	cyan
Pdia5	0.654424411344036	0.750666981360136	0.5112665	0.607509035785056	1.26193344712909	cyan
Eps8	0.653454607427636	1.14950660670408	0.236967820729503	0.733019820005943	1.38647442743358	cyan
Soat1	0.636695652828554	1.09222837186825	0.6724401	1.12797284166146	1.76466849449001	cyan
Ostc	0.633371273896103	1.19243249811258	0.1722744	0.731335577978258	1.36470685187436	cyan
Trim21	0.632635559707188	0.511329562641752	0.094641	-0.0266649989529345	0.605970560754254	cyan
Man2a1	0.623347561519268	0.826151840688236	0.3960703	0.598874593882801	1.22222215540207	cyan
Znfx1	0.621896392549712	0.53025151803723	-0.09330943	-0.184954304628778	0.436942087920934	cyan
Manf	0.619729428411878	0.913425035470402	-0.03155177	0.262143840911158	0.881873269323036	cyan
Clic1	0.615723710996952	1.35622676069372	0.497795975245265	1.23829902494204	1.85402273593899	cyan
Ptgfrn	0.612254382063151	1.00844038766567	0.09979633	0.495982336711466	1.10823671877462	cyan
Serpinb9	0.607243732490983	0.202233451922853	0.5380184	0.133008132973593	0.740251865464576	cyan
Dnm1	0.595821405980508	0.731954675537632	-0.260712931746278	-0.124579662189154	0.471241743791354	cyan
Vmp1	0.595765211826725	0.816523187950994	-0.03362366	0.187134315675169	0.782899527501894	cyan
Sat1	0.59526447818901	0.412069605039438	0.5127286	0.329533677527304	0.924798155716314	cyan
Vim	0.590669857430642	1.04131715826487	0.780115	1.23076229468036	1.82143215211101	cyan
Zfp954	0.588894258042547	-0.0941779385310454	0.4502843	-0.232787907767084	0.356106350275463	cyan
Ap2m1	0.588567496875748	1.0155676337227	0.239889969115749	0.6668901059627	1.25545760283845	cyan
Tpm4	0.584818610282884	0.824905493096905	0.762462	1.00254892378061	1.5873675340635	cyan
Ifngr2	0.575814162640217	0.262478895232237	0.5019596	0.188624297639173	0.76443846027939	cyan
Slc41a2	0.569441061119918	0.686186835306701	0.7776149	0.89436066707802	1.46380172819794	cyan
Itga9	0.560444158982109	0.322469073164099	0.1010376	-0.136937532690412	0.423506626291697	cyan
Rap1b	0.5559874108862	0.898337282484915	0.4575698	0.799919686549137	1.35590709743534	cyan
Snx6	0.553267213791583	1.02999871507948	-0.04098131	0.435750191345123	0.989017405136705	cyan
Myadm	0.542847430986587	0.797338921209466	-0.03531015	0.219181341680215	0.762028772666802	cyan
Sepn1	0.534463819498042	0.466368360444624	0.03865117	-0.0294442887353759	0.505019530762666	cyan
Ifi35	0.533717011217196	0.647919882525152	0.0595494	0.173752269880313	0.707469281097509	cyan
Apaf1	0.533606002503952	0.834865502797591	0.387230448151502	0.688489948445141	1.22209595094909	cyan
Tcirg1	0.530098879295987	1.03589721143971	0.1395609	0.645359209150003	1.17545808844599	cyan
Tpm3	0.526285397745701	0.924083146330943	0.5517606	0.949558338206911	1.47584373595261	cyan
Plxnb2	0.514458418863076	1.25180228792564	-0.04221126	0.695132610037809	1.20959102890089	cyan
Sec24d	0.511144665532926	0.177476103294491	0.7103097	0.376641117959237	0.887785783492163	cyan
Bach1	0.501726516400618	1.00893396386888	0.1662016445046	0.673409091972861	1.17513560837348	cyan
Trafd1	0.497143861318625	0.224627040425449	0.3804727	0.107955849631197	0.605099710949822	cyan
Ankfy1	0.491148672831127	0.667133751895705	0.14207826325994	0.318063342324517	0.809212015155644	cyan
Cd47	0.483623960580809	0.5117057711323	0.103186893302084	0.131268703853575	0.614892664434384	cyan
Ssbp4	0.475678220677973	0.600267648647208	0.0009396735	0.125529101509627	0.6012073221876	cyan
Rap2a	0.474147646671612	0.886364681627169	0.2097863	0.622003381687547	1.09615102835916	cyan
Casp8	0.461621287654562	0.590799811639788	0.316684381626587	0.445862905611813	0.907484193266375	cyan
Srgap2	0.460415479904928	0.692487369421307	0.1346447	0.366716616992941	0.827132096897869	cyan
Dpysl2	0.458728223370457	0.762689659889999	-0.133682603163165	0.170278833356378	0.629007056726835	cyan
Sptlc2	0.455528683487586	0.764228538467214	0.1239483	0.432648133523946	0.888176817011532	cyan
S100a10	0.452830555513792	0.908281933878667	0.2395923	0.695043707850425	1.14787426336422	cyan
Sgpp1	0.445953223482056	0.567692731042779	-0.171847	-0.0501075163297075	0.395845707152348	cyan
Actr2	0.439191820386457	0.754420191025916	0.482610726122143	0.797839096761602	1.23703091714806	cyan
Pdia3	0.436154026131969	0.883224443861951	-0.06237052	0.384699896361575	0.820853922493544	cyan
Zyx	0.425816774750626	1.07286917068544	-0.08869117	0.558361221097435	0.984177995848061	cyan
Pdia4	0.423988779721476	0.986461905050103	-0.06463136	0.49784176733156	0.921830547053036	cyan
Ogfr	0.423210396113905	0.605434924476242	0.001603336	0.183827864444643	0.607038260558548	cyan
Tmem165	0.412312260746526	0.401823100458625	0.5414079	0.530918693602118	0.943230954348644	cyan
Coro1c	0.406101335164183	0.881034070644876	0.622973546738415	1.09790628221911	1.50400761738329	cyan
Prr13	0.405853870838362	0.487225473607779	0.120583	0.201954560642368	0.60780843148073	cyan
Vamp8	0.404262178052721	0.549693679778343	0.1672271	0.312658613249197	0.716920791301918	cyan
Heatr5a	0.395839856010403	0.801519412232956	0.310464355804889	0.716143912027441	1.11198376803784	cyan
Spred1	0.393986549623394	0.808824129008499	-0.1032024	0.311635205745207	0.705621755368602	cyan
Actb	0.393759846324013	0.660284657925234	0.68956383280266	0.956088644403881	1.34984849072789	cyan
Arpc1b	0.391665902151783	0.804986602330416	0.297919218317174	0.711239918495806	1.10290582064759	cyan
Hspa5	0.384167111443112	0.832215533909842	0.04284426	0.490892686290189	0.875059797733301	cyan
Iqgap1	0.377258141583727	0.622633484509819	0.5023254	0.747700722748339	1.12495886433207	cyan
Ppib	0.373441657384589	0.52416293445814	0.1001679	0.250889129535691	0.624330786920279	cyan
Slc23a2	0.3697766456603	0.556655129175699	0.1667864	0.353664932368609	0.723441578028908	cyan
Calr	0.365970700089044	0.745321524045223	0.0451471785902011	0.42449800254638	0.790468702635424	cyan
Scpep1	0.365795187838504	0.724763283068043	0.07920806	0.438176160031902	0.803971347870406	cyan
Txndc5	0.349142741184646	0.611864122255526	-0.09676422	0.165957164224228	0.515099905408874	cyan
Wdr1	0.341448684584859	0.608361743823856	0.4141574	0.681070502324486	1.02251918690934	cyan
Pdia6	0.34065285836915	1.05884004000971	-0.08478956	0.63339762115551	0.97405047952466	cyan
Pxn	0.331655940057332	0.444940736887334	-0.01629253	0.0969922692394744	0.428648209296807	cyan
Eps15	0.328501717822472	0.240615196761361	0.039273620288537	-0.0486129007725739	0.279888817049898	cyan
Ddost	0.327592668721736	0.618954579559368	0.0129055627846523	0.304267473622284	0.63186014234402	cyan
Tmod3	0.313046103264872	0.0834709783020108	0.393801	0.164225877745276	0.477271981010148	cyan
Actg1	0.305540635610506	0.743376887288893	0.324883798991224	0.762720050669611	1.06826068628012	cyan
Arf5	0.30121814330303	0.668164891028571	-0.00566693915630479	0.361279808569236	0.662497951872267	cyan
Myh9	0.257287025518549	0.249088180130661	0.4628317	0.454632864399681	0.71191988991823	cyan
Ap2b1	0.222943942225301	0.32960950870243	0.184738394918676	0.291403961395805	0.514347903621105	cyan
